# Supplementary material for: Specific detection of form IA RubisCO genes in chemoautotrophic bacteria
Source: PubMed Central journal article supplement (PMC7610800; doi:10.1002/jobm.201800136), 2018-05-24
Supplement: EMS124248-supplement-Figure_S1.pdf [file EMS124248-supplement-Figure_S1.pdf]

## METHOD PAPER

### Specific detection of form IA RubisCO genes in chemoautotrophic bacteria

Albin Alfreider<sup>1</sup>, Teresa Bogensperger<sup>1,2</sup>

<sup>1</sup>Institute of Ecology, University of Innsbruck, Austria

<sup>2</sup>Department for Internal Medicine IV, Hospital Wels Grieskirchen GmbH, Austria

DOI 10.1002/jobm.201800136

**FIGURE S1** Alignment of *cbbL* form IA sequences encompassing the region used for primer design. The annealing position of the primer is underlined and bases are shown in bold. Base mismatches between the primer and the template sequences are indicated by red letters.

---

|                                                  |                                                                      |
|--------------------------------------------------|----------------------------------------------------------------------|
| Primer cbbL_IA_CHEM                              | GARGGNTCNGTNGTYAACGT                                                 |
| <i>Acidithiobacillus ferrooxidans</i> (X7355)    | TACCCCATCGATCTCTTCGAA <u>GAAGGTTCCGTGGTCAACGT</u> CTTCACCTCGCTGGTT   |
| <i>Actinoplanes subtropicus</i> (NZ_JOJL116)     | TACCCCTCGATCTCTTCGAG <u>GAGGGATCCGTGGTCAACGT</u> CCTGACGTCGCTGGCC    |
| <i>Acidimicrobium ferrooxidans</i> (CP1631)      | TACCCGATCGACCTCTTCGAA <u>GAGGGCTCGGTTCGTCAACGT</u> CTTCACATCGCTGGTC  |
| <i>Nitrobacter winogradskyi</i> (AF19915)        | TACCCCATCGACCTTTTTGAG <u>GAAGGCTCGGTTCGTCAACGT</u> GTTACCTCGCTGGTG   |
| <i>Comamonadaceae bacterium H1</i> (NZ_BAWN111)  | TACCCGATCGACCTGTTTCGAA <u>GAGGGCTCGGTGGTCAACGT</u> GTTTACCTCGCTGGTG  |
| <i>Hydrogenophaga pseudoflava</i> (U5537)        | TACCCGATCGACCTGTTTCGAG <u>GAGGGCTCGGTGGTCAACGT</u> ACTGACCTCGCTGGTG  |
| <i>Limnohabitans</i> sp. 63ED37-2 (CP11774)      | TACCCCATCGACCTGTTTCGAA <u>GAGGGCTCGGTTCGTCAACGT</u> GCTGACCTCTTTGGTC |
| <i>Nitrosomonas halophila</i> Nm1 (FNOY11)       | TATCCGATCGATTTGTTTGAA <u>GAAGGTTCCGTGGTCAACGT</u> GTTACCTCGTTGGTC    |
| <i>Nitrosomonas</i> sp. AL212 (CP2552)           | TACCCGATTGATCTTTTTGAA <u>GAAGGTTCCGTTCGTCAACGT</u> GTTGACCTCCCTGGTA  |
| <i>Nitrosospira</i> sp. TCH716 (AF459718)        | TATCCCATCGACCTTTTTGAA <u>GAAGGTTCCGTTGTCAACGT</u> GTTACCTCGCTGGTG    |
| <i>Sulfuricella denitrificans</i> skB26 (AP1366) | TACCCGATCGACCTGTTTCGAA <u>GAAGGATCCGTTCGTCAACGT</u> TCTGACTTCGCTGGTG |
| <i>Thiobacillus</i> sp. SCN 64-317 (MEG0125)     | TACCCAATCGACCTGTTTCGAG <u>GAAGGCTCGGTTCGTCAACGT</u> GCTGACCTCGCTGGTC |
| <i>Hydrogenovibrio marinus</i> (AB1227)          | TACCCACTAGACCTATTTGAA <u>GAAGGTTCTGTGGTTAACGT</u> ATTGACTTCATTGGTT   |
| <i>Oxygenic Photoautotrophs</i>                  |                                                                      |
| <i>Planktothrix agardhii</i> (CM283)             | TATCCTCTGGATCTGTTTGAA <u>GAAGGTTCCGTTACCAACTT</u> ACTGACATCTTTAGTC   |
| <i>Prochlorococcus marinus</i> (NZ_JNAL115)      | TATCCTTTAGATCTTTTTGAA <u>GAAGGCTCAATTACAAACGT</u> ATTAAACATCATTAGTA  |
| <i>Synechococcus rubescens</i> (AM71775)         | TATCCCTCGACCTGTTTCGAA <u>GAAGGCTCCATCACCAACGT</u> TCTGACCTCCTTGGTC   |
| <i>Synechococcus</i> sp. CB25 (NZ_ADXM148)       | TACCCCTCGATCTGTTTCGAA <u>GAGGGTTCCGTACCAACGT</u> TCTGACCTCCCTGGTC    |
| <i>Synechococcus</i> sp. PCC792 (AM71776)        | TATCCCTCGACCTGTTTCGAG <u>GAGGGGTCGATCACCAACGT</u> GCTCACCTCCCTGGTG   |
| Primer cbbL_IA_CHEM                              | GARGGNTCNGTNGTYAACGT                                                 |

---
